# Supplementary material
Source: PubMed Central journal article supplement (PMC8045647)

Supplement S1

**Significance tests and mean values of malaria indicators in different classification groups**

Classification method: *k*-mean.

Splitting rules: a) all variables used must be significantly different between/among classified groups; b) each group must have at least 5 members.

**1. Classification I**

Malaria transmission indicators used: Parasite infection prevalence (%) in June and November 2019, vector density (females/house/night) in July 2019 and January 2020.

**1.1. K=2**

Analysis of variance

|                       | Between SS | df | Within SS | df | F      | P-value |
|-----------------------|------------|----|-----------|----|--------|---------|
| November prevalence   | 2597.17    | 1  | 2876.89   | 34 | 30.69  | 0.0000  |
| June prevalence       | 2890.33    | 1  | 967.39    | 34 | 101.58 | 0.0000  |
| January adult density | 3.76       | 1  | 19.34     | 34 | 6.62   | 0.0147  |
| July adult density    | 4.60       | 1  | 6.21      | 34 | 25.18  | 0.0000  |

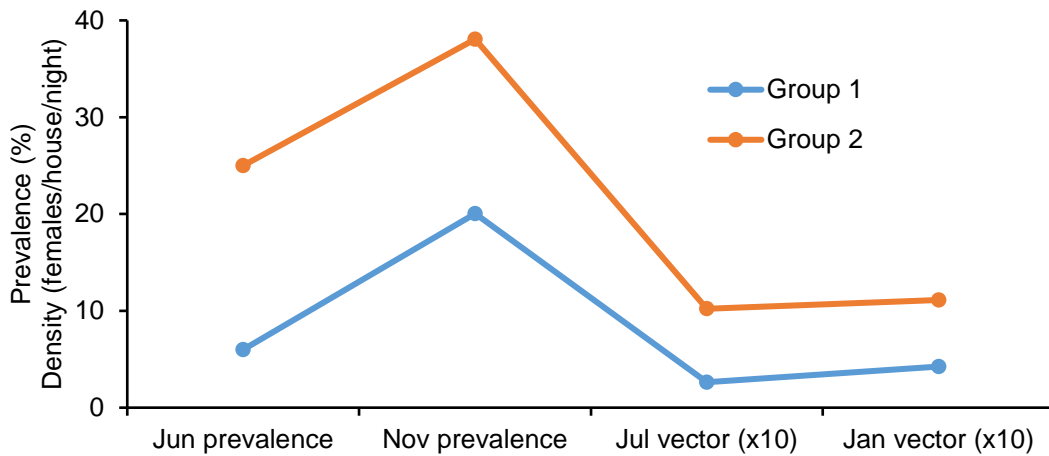

**1.2. K=3**

Analysis of variance

|                       | Between SS | df | Within SS | df | F     | P-value |
|-----------------------|------------|----|-----------|----|-------|---------|
| November prevalence   | 4116.94    | 2  | 1357.12   | 33 | 50.05 | 0.0000  |
| June prevalence       | 2893.16    | 2  | 964.56    | 33 | 49.49 | 0.0000  |
| January adult density | 4.15       | 2  | 18.96     | 33 | 3.61  | 0.0383  |
| July adult density    | 4.62       | 2  | 6.19      | 33 | 12.31 | 0.0001  |

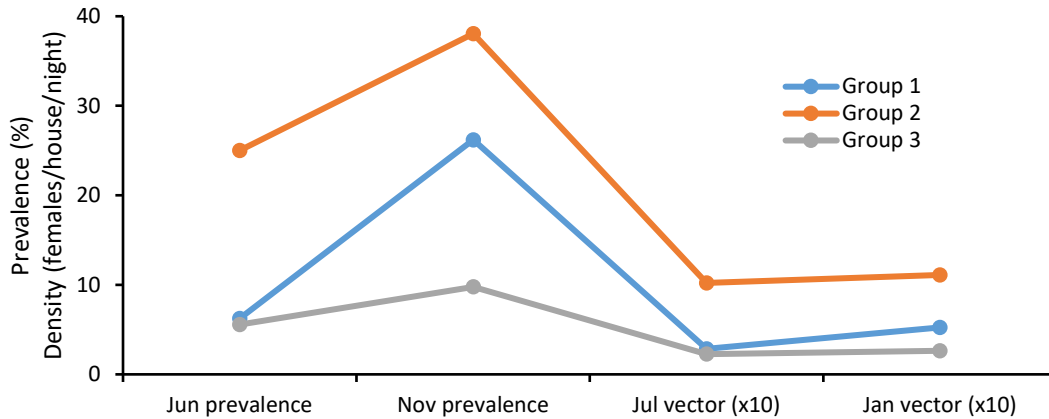

### 1.3. K=5

#### Analysis of variance

|                       | Between SS | df | Within SS | df | F     | signif. p |
|-----------------------|------------|----|-----------|----|-------|-----------|
| November prevalence   | 4997.86    | 4  | 476.20    | 31 | 81.34 | 0.0000    |
| June prevalence       | 3228.65    | 4  | 629.07    | 31 | 39.78 | 0.0000    |
| January adult density | 6.22       | 4  | 16.89     | 31 | 2.85  | 0.0402    |
| July adult density    | 6.15       | 4  | 4.66      | 31 | 10.23 | 0.0000    |

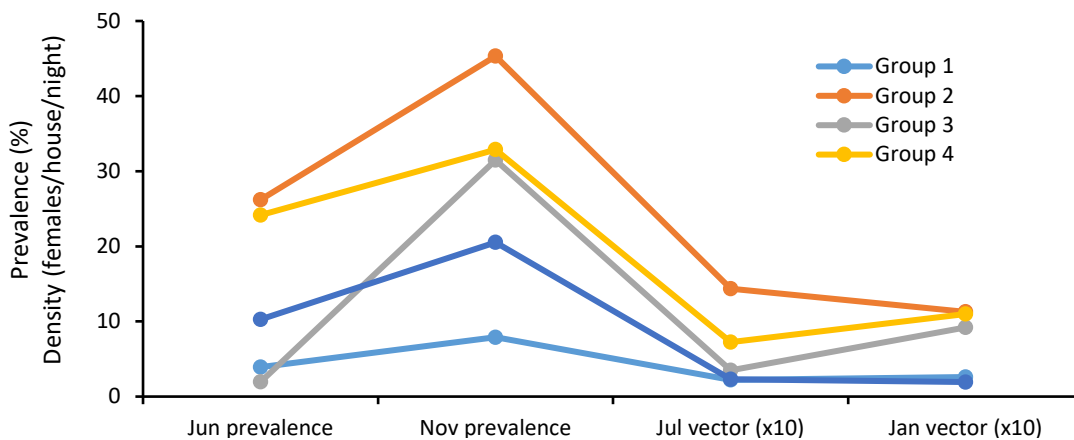

## 2. Classification II

Malaria transmission indicators used: Parasite infection prevalence (%) in June and November 2019, vector density (females/house/night) in July 2019 and January 2020, and malaria incidence (cases/1,000 people/month).

### 2.1. K=2

#### Analysis of variance

|                       | Between SS | df | Within SS | df | F     | P-value |
|-----------------------|------------|----|-----------|----|-------|---------|
| November prevalence   | 1551.54    | 1  | 3922.52   | 34 | 13.45 | 0.0008  |
| June prevalence       | 547.77     | 1  | 3309.95   | 34 | 5.63  | 0.0235  |
| January adult density | 5.83       | 1  | 17.27     | 34 | 11.49 | 0.0018  |
| July adult density    | 1.96       | 1  | 8.86      | 34 | 7.50  | 0.0097  |
| Incidence rate        | 12431.67   | 1  | 6318.70   | 34 | 66.89 | 0.0000  |

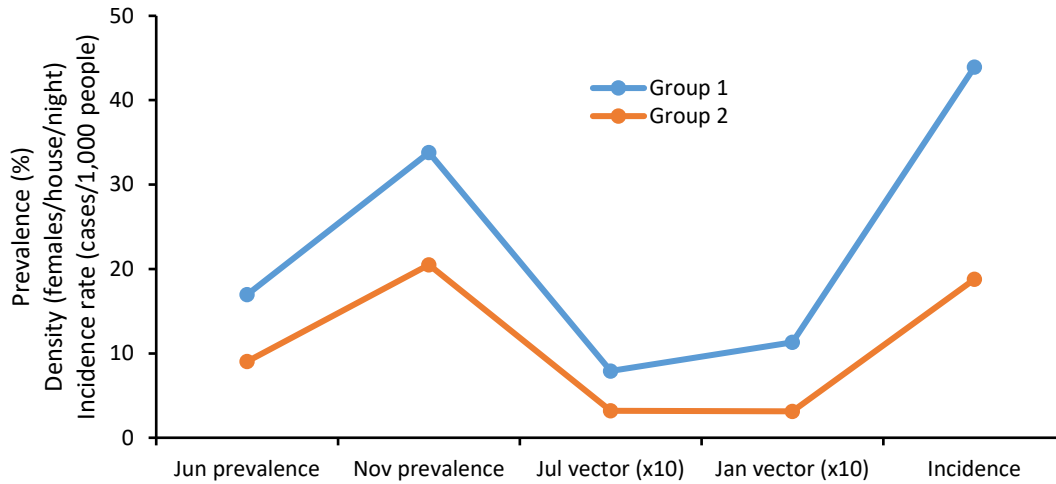

## 2.2. K=3

### Analysis of variance

|                       | Between SS | df | Within SS | df | F     | P-value |
|-----------------------|------------|----|-----------|----|-------|---------|
| November prevalence   | 2458.04    | 2  | 3016.02   | 33 | 13.45 | 0.0001  |
| June prevalence       | 1818.33    | 2  | 2039.39   | 33 | 14.71 | 0.0000  |
| January adult density | 5.89       | 2  | 17.21     | 33 | 5.65  | 0.0078  |
| July adult density    | 3.78       | 2  | 7.03      | 33 | 8.88  | 0.0008  |
| Incidence rate        | 12805.73   | 2  | 5944.64   | 33 | 35.54 | 0.0000  |

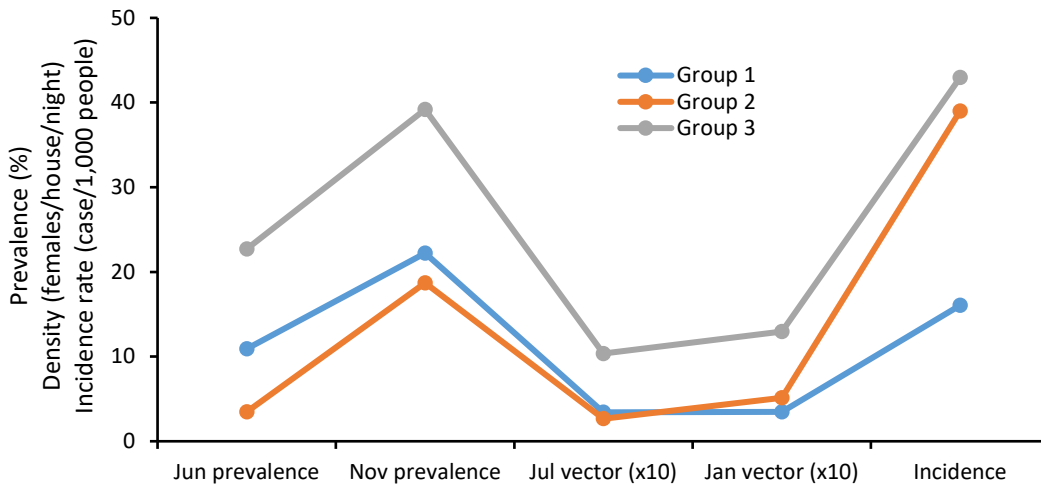

## 3. Classification II

Malaria transmission indicators used: Parasite infection prevalence (%) in June and November 2019, and malaria incidence (cases/1,000 people/month).

### 3.1. K=2

#### Analysis of variance

|                     | Between SS | df | Within SS | df | F     | P-value |
|---------------------|------------|----|-----------|----|-------|---------|
| November prevalence | 1551.54    | 1  | 3922.52   | 34 | 13.45 | 0.0008  |
| June prevalence     | 547.77     | 1  | 3309.95   | 34 | 5.63  | 0.0235  |
| Incidence rate      | 12431.67   | 1  | 6318.70   | 34 | 66.89 | 0.0000  |

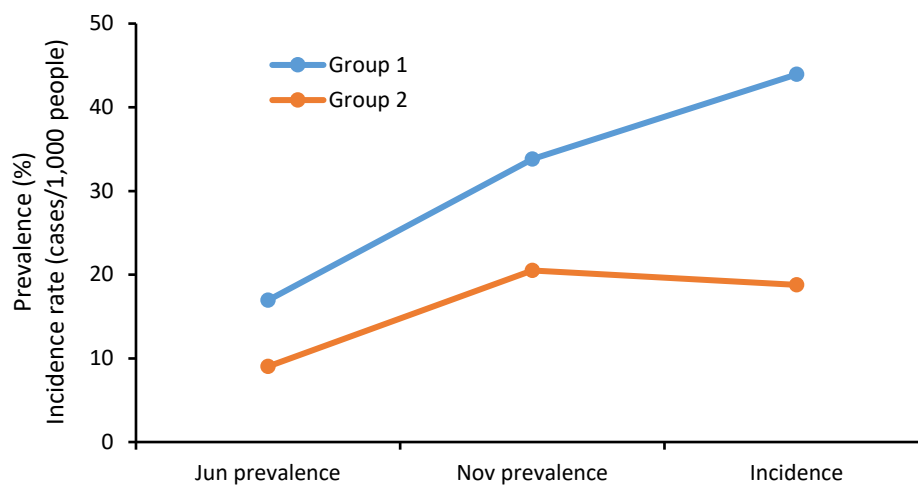

### 3.2. K=3

#### Analysis of variance

|                     | Between SS | df | Within SS | df | F     | P-value |
|---------------------|------------|----|-----------|----|-------|---------|
| November prevalence | 2458.04    | 2  | 3016.02   | 33 | 13.45 | 0.0001  |
| June prevalence     | 1818.33    | 2  | 2039.39   | 33 | 14.71 | 0.0000  |
| Incidence rate      | 12805.73   | 2  | 5944.64   | 33 | 35.54 | 0.0000  |

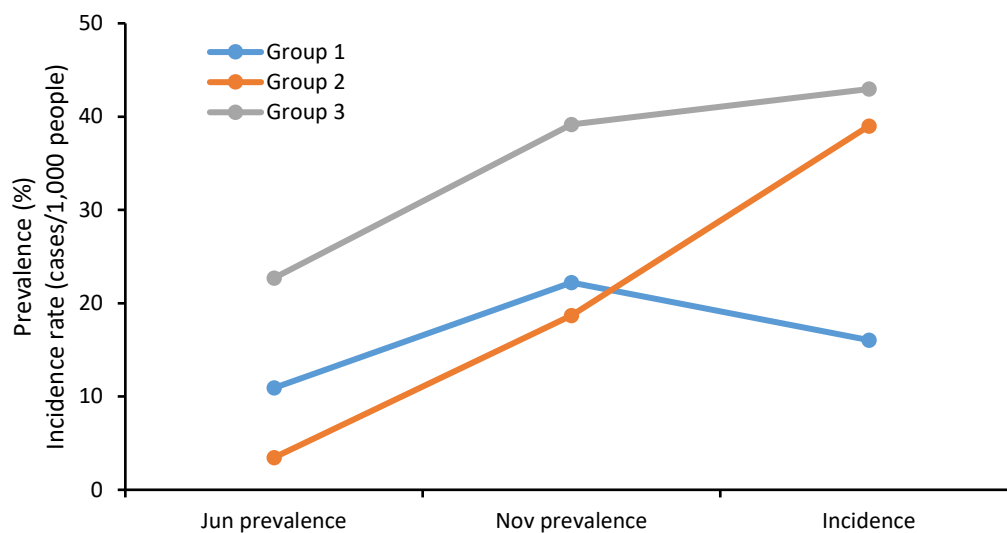

Supplement: tpmd201211.SD1.pdf [file tpmd201211.SD1.pdf]
