# Supplementary material
Source: PubMed Central journal article supplement (PMC8045647)
Supplement: tpmd201211.SD2.pdf [file tpmd201211.SD2.pdf]

Supplement S2

**Model performance and variable importance**

Model performance and variable importance are outcomes of GBM multinomial logistic regression based on classification results (refer to Supplement S1) and risk factors. The difference between different classifications are the malaria transmission indicators used. Models were established based on individual/household surveys in each cluster; model evaluation parameters included overall accuracy, sensitive and specificity, and individual group accuracy for  $k > 2$ . Individual group sensitivity and specificity were calculated using one group against the rest. Importance was calculated as percentage to total importance of 100%.

**1. Classification I**

Malaria transmission indicators used: Parasite infection prevalence (%) in June and November 2019, vector density (females/house/night) in July 2019 and January 2020.

Table 1. Model performance and variable importance (top 10 only) of classification I

| Number of groups & performance |             |             | Top 10 variance             | Importance (%) |
|--------------------------------|-------------|-------------|-----------------------------|----------------|
| <b>K= 2 †</b>                  |             |             |                             |                |
| Accuracy                       | 0.990       |             | Variable                    | Importance     |
| Sensitivity                    | 0.995       |             | Altitude                    | 64.5           |
| Specificity                    | 0.976       |             | Distance to River           | 3.3            |
|                                |             |             | WT N habitats, dry season ‡ | 2.0            |
|                                |             |             | Distance to Road            | 2.0            |
|                                |             |             | Distance to Lake            | 1.8            |
|                                |             |             | LST Day time, Feb ¶         | 1.8            |
|                                |             |             | Ground surface roughness    | 1.7            |
|                                |             |             | Topographic wetness index   | 1.7            |
|                                |             |             | EVI, 2019 ¶¶                | 1.6            |
|                                |             |             | NDVI, Sep ¶¶                | 1.5            |
| <b>K = 3 †</b>                 |             |             |                             |                |
| Accuracy                       | 0.921       |             | Variable                    | Importance     |
| Sensitivity                    | 0.919       |             | Altitude                    | 53.8           |
| Specificity                    | 0.957       |             | Distance to River           | 5.5            |
|                                |             |             | WT N habitats, dry season ‡ | 2.7            |
|                                |             |             | Distance to Lake            | 2.6            |
|                                |             |             | WT N ponds ‡                | 2.5            |
|                                |             |             | Distance to Health Facility | 2.2            |
|                                |             |             | Distance to Road            | 2.0            |
|                                |             |             | WT N habitats, wet season ‡ | 1.9            |
|                                |             |             | Evapotranspiration, 2019 ¶¶ | 1.7            |
|                                |             |             | EVI, 2019 ¶¶                | 1.6            |
| <b>K = 5 †</b>                 |             |             |                             |                |
|                                | Sensitivity | Specificity |                             |                |
| Group 1                        | 0.932       | 0.913       |                             |                |
| Group 2                        | 0.924       | 0.987       |                             |                |
| Group 3                        | 0.902       | 0.971       |                             |                |

|             |             |             |                             |            |
|-------------|-------------|-------------|-----------------------------|------------|
| Accuracy    | 0.800       |             | Variable                    | Importance |
| Sensitivity | 0.801       |             | Altitude                    | 49.6       |
| Specificity | 0.886       |             | Distance to River           | 3.7        |
|             |             |             | WT N habitats, dry season ‡ | 3.7        |
|             | Sensitivity | Specificity | Distance to Road            | 3.5        |
| Group 1     | 0.742       | 0.951       | WT N ponds ‡                | 2.7        |
| Group 2     | 0.780       | 0.886       | Distance to Health Facility | 2.4        |
| Group 3     | 0.825       | 0.858       | Distance to Lake            | 2.3        |
| Group 4     | 0.845       | 0.836       | NDVI, Oct ¶                 | 2.2        |
| Group 5     | 0.814       | 0.901       | WT N habitats, wet season ‡ | 2.0        |
|             |             |             | NDVI, May ¶                 | 1.9        |

† k is the number of classified groups.

‡ Weighted number of habitats or water pond by seasons.

¶ Monthly (e.g., May) or annual (e.g., 2019) mean vegetation index or evapotranspiration.  
NDVI: normalized difference vegetation index; EVI: enhanced vegetation index.

## 2. Classification II

Malaria transmission indicators used: Parasite infection prevalence (%) in June and November 2019, vector density (females/house/night) in July 2019 and January 2020, and malaria incidence (cases/1,000 people/month).

Table 2. Model performance and variable importance (top 10 only) of classification II

| Number of groups & performance |       | Top 10 variance             |  | Importance |
|--------------------------------|-------|-----------------------------|--|------------|
| <b>K = 2 †</b>                 |       |                             |  |            |
| Accuracy                       | 0.989 | Variable                    |  | Importance |
| Sensitivity                    | 0.984 | Altitude                    |  | 47.8       |
| Specificity                    | 0.993 | WT N ponds ‡                |  | 5.9        |
|                                |       | Distance to River           |  | 2.8        |
|                                |       | WT N habitats, wet season ‡ |  | 2.6        |
|                                |       | EVI, 2019 ¶                 |  | 2.5        |
|                                |       | Ground surface roughness    |  | 2.5        |
|                                |       | Valley bottom flatness      |  | 2.4        |
|                                |       | Distance to Lake            |  | 2.0        |
|                                |       | Aspect                      |  | 2.0        |
|                                |       | Distance to Road            |  | 1.7        |
| <b>K = 3 †</b>                 |       |                             |  |            |
| Accuracy                       | 0.906 | Variable                    |  | Importance |
| Sensitivity                    | 0.896 | Altitude                    |  | 44.6       |
| Specificity                    | 0.945 | WT N habitats, dry season ‡ |  | 4.1        |

|         | Sensitivity | Specificity |                             |     |
|---------|-------------|-------------|-----------------------------|-----|
| Group 1 | 0.942       | 0.877       | WT N habitats, wet season ‡ | 3.6 |
| Group 2 | 0.888       | 0.978       | WT N ponds ‡                | 3.1 |
| Group 3 | 0.857       | 0.980       | Distance to Road            | 3.1 |
|         |             |             | LST Day time, Feb ¶         | 2.9 |
|         |             |             | Distance to River           | 2.8 |
|         |             |             | Distance to Lake            | 2.3 |
|         |             |             | Ground surface roughness    | 2.0 |
|         |             |             | EVI, Feb ¶                  | 2.0 |

† k is the number of classified groups.

‡ Weighted number of habitats or water pond by seasons.

¶ Monthly (e.g., Feb) or annual (e.g., 2019) mean vegetation index or temperature. NDVI: normalized difference vegetation index; EVI: enhanced vegetation index; LST: land surface temperature.

### 3. Classification III

Malaria transmission indicators used: Parasite infection prevalence (%) in June and November 2019, and malaria incidence (cases/1,000 people/month).

Table 3. Model performance and variable importance (top 10 only) of classification III

| Number of groups & performance |       | Top 10 variance             | Importance (%) |
|--------------------------------|-------|-----------------------------|----------------|
| <b>K = 2 †</b>                 |       |                             |                |
| Accuracy                       | 0.991 | Variable                    | Importance     |
| Sensitivity                    | 0.985 | Altitude                    | 47.7           |
| Specificity                    | 0.994 | WT N ponds ‡                | 6.0            |
|                                |       | Distance to River           | 2.7            |
|                                |       | WT N habitats, dry season ‡ | 2.6            |
|                                |       | Ground surface roughness    | 2.6            |
|                                |       | EVI, 2019 ¶                 | 2.5            |
|                                |       | Valley bottom flatness      | 2.4            |
|                                |       | Distance to Lake            | 2.1            |
|                                |       | Aspect                      | 2.0            |
|                                |       | NDVI, Oct ¶                 | 1.7            |
| <b>K = 3 †</b>                 |       |                             |                |
| Accuracy                       | 0.911 | Variable                    | Importance     |
| Sensitivity                    | 0.901 | Altitude                    | 44.5           |
| Specificity                    | 0.948 | WT N habitats, wet season ‡ | 4.1            |
|                                |       | WT N habitats, dry season ‡ | 3.6            |
|                                |       | WT N ponds ‡                | 3.1            |
|                                |       | Distance to Road            | 3.1            |

|         |       |       |                          |     |
|---------|-------|-------|--------------------------|-----|
| Group 2 | 0.892 | 0.979 | Distance River           | 2.9 |
| Group 3 | 0.868 | 0.981 | LST Day time, Feb ¶      | 2.8 |
|         |       |       | Distance to Lake         | 2.4 |
|         |       |       | Ground surface roughness | 2.0 |
|         |       |       | EVI, Feb ¶               | 2.0 |

† k is the number of classified groups.

‡ Weighted number of habitats or water pond by seasons.

¶ Monthly (e.g., Oct) or annual (e.g., 2019) mean vegetation index or temperature. NDVI: normalized difference vegetation index; EVI: enhanced vegetation index; LST: land surface temperature.
