# Supplementary material
Source: PubMed Central journal article supplement (PMC8045647)
Supplement: tpmd201211.SD3.pdf [file tpmd201211.SD3.pdf]

Supplementary S3

Table S1. Model predicted risk probability by classification group and cluster number (see Figure 6 for group color and cluster numbers).

| Zone             | Cluster number | Risk probability (mean $\pm$ SD) |
|------------------|----------------|----------------------------------|
| Lake plain       | 1              | 0.57 $\pm$ 0.08                  |
|                  | 2              | 0.62 $\pm$ 0.19                  |
|                  | 3              | 0.51 $\pm$ 0.18                  |
|                  | 4              | 0.57 $\pm$ 0.15                  |
|                  | 5              | 0.62 $\pm$ 0.14                  |
|                  | 6              | 0.64 $\pm$ 0.12                  |
|                  | 7              | 0.61 $\pm$ 0.12                  |
|                  | 8              | 0.64 $\pm$ 0.10                  |
|                  | 9              | 0.58 $\pm$ 0.19                  |
|                  | 10             | 0.67 $\pm$ 0.12                  |
|                  | 11             | 0.61 $\pm$ 0.12                  |
|                  | 12             | 0.59 $\pm$ 0.15                  |
|                  | 24             | 0.66 $\pm$ 0.12                  |
| Middle slope     | 13             | 0.62 $\pm$ 0.13                  |
|                  | 14             | 0.64 $\pm$ 0.18                  |
|                  | 15             | 0.72 $\pm$ 0.15                  |
|                  | 16             | 0.73 $\pm$ 0.11                  |
|                  | 17             | 0.66 $\pm$ 0.15                  |
|                  | 18             | 0.67 $\pm$ 0.14                  |
|                  | 19             | 0.65 $\pm$ 0.15                  |
|                  | 20             | 0.63 $\pm$ 0.11                  |
|                  | 21             | 0.54 $\pm$ 0.14                  |
|                  | 22             | 0.68 $\pm$ 0.13                  |
|                  | 23             | 0.68 $\pm$ 0.13                  |
| Highland plateau | 25             | 0.64 $\pm$ 0.16                  |
|                  | 26             | 0.70 $\pm$ 0.11                  |
|                  | 27             | 0.68 $\pm$ 0.14                  |
|                  | 28             | 0.65 $\pm$ 0.18                  |
|                  | 29             | 0.64 $\pm$ 0.18                  |
|                  | 30             | 0.67 $\pm$ 0.15                  |
|                  | 31             | 0.71 $\pm$ 0.12                  |
|                  | 32             | 0.68 $\pm$ 0.11                  |
|                  | 33             | 0.72 $\pm$ 0.10                  |
|                  | 34             | 0.67 $\pm$ 0.14                  |
|                  | 35             | 0.64 $\pm$ 0.15                  |
|                  | 36             | 0.59 $\pm$ 0.14                  |
