# Supplementary material
Source: PubMed Central journal article supplement (PMC8045647)
Supplement: tpmd201211.SD4.pdf [file tpmd201211.SD4.pdf]

Supplementary S4: Results of regression analysis based on classifications using adjusted risk indicators

Table S2-1. Multinomial regression model. Response level 3 is the reference group

| Variables                      | Level of Response | Estimate | Standard Error | Wald Stat. | p     |
|--------------------------------|-------------------|----------|----------------|------------|-------|
| Intercept 1                    | C1                | 2.93     | 1.23           | 5.64       | 0.018 |
| Net Number per household       | C1                | 0.01     | 0.03           | 0.18       | 0.675 |
| N water pond                   | C1                | -0.01    | 0.01           | 0.34       | 0.563 |
| Weighted N pond                | C1                | -0.03    | 0.05           | 0.39       | 0.530 |
| Weighted N habitats wet season | C1                | -0.04    | 0.02           | 5.24       | 0.022 |
| Weighted N habitats dry season | C1                | 0.04     | 0.01           | 13.56      | 0.000 |
| NDVI Oct                       | C1                | 0.84     | 0.89           | 0.89       | 0.345 |
| NDVI Sep                       | C1                | 1.40     | 1.06           | 1.75       | 0.186 |
| NDVI May                       | C1                | -3.14    | 1.19           | 6.98       | 0.008 |
| NDVI Apr                       | C1                | 1.92     | 1.01           | 3.63       | 0.057 |
| EVI Dec                        | C1                | 1.58     | 0.96           | 2.71       | 0.100 |
| EVI May                        | C1                | 1.21     | 0.67           | 3.27       | 0.070 |
| EVI Feb                        | C1                | -1.11    | 0.97           | 1.30       | 0.253 |
| Land surface roughness         | C1                | -1.22    | 0.41           | 8.97       | 0.003 |
| Valley bottom flatness         | C1                | 0.00     | 0.00           | 8.08       | 0.004 |
| Soil water capacity            | C1                | -1.43    | 0.72           | 3.94       | 0.047 |
| Curvature volume               | C1                | 0.13     | 0.04           | 9.39       | 0.002 |
| Distance to the ILake          | C1                | -0.03    | 0.00           | 61.13      | 0.000 |
| Distance to the nearest river  | C1                | 0.03     | 0.01           | 19.27      | 0.000 |
| Land surface temperature Feb   | C1                | -2.48    | 0.72           | 11.99      | 0.001 |
| Intercept 2                    | C2                | 4.23     | 1.33           | 10.03      | 0.002 |
| Net Number per household       | C2                | 0.05     | 0.03           | 3.01       | 0.083 |
| N water pond                   | C2                | 0.03     | 0.01           | 6.76       | 0.009 |
| Weighted N pond                | C2                | -0.21    | 0.05           | 20.64      | 0.000 |
| Weighted N habitats wet season | C2                | 0.08     | 0.02           | 18.95      | 0.000 |
| Weighted N habitats dry season | C2                | -0.11    | 0.01           | 56.02      | 0.000 |
| NDVI Oct                       | C2                | -2.69    | 1.03           | 6.85       | 0.009 |
| NDVI Sep                       | C2                | 3.11     | 1.01           | 9.42       | 0.002 |
| NDVI May                       | C2                | 0.85     | 1.29           | 0.43       | 0.512 |
| NDVI Apr                       | C2                | 1.02     | 1.11           | 0.84       | 0.359 |
| EVI Dec                        | C2                | -1.71    | 1.04           | 2.72       | 0.099 |
| EVI May                        | C2                | -0.19    | 0.66           | 0.08       | 0.771 |
| EVI Feb                        | C2                | -3.51    | 1.05           | 11.19      | 0.001 |

|                               |    |       |      |       |       |
|-------------------------------|----|-------|------|-------|-------|
| Land surface roughness        | C2 | -1.13 | 0.48 | 5.65  | 0.017 |
| Valley bottom flatness        | C2 | 0.00  | 0.00 | 0.55  | 0.459 |
| Soil water capacity           | C2 | 0.69  | 0.74 | 0.89  | 0.347 |
| Curvature volume              | C2 | 0.05  | 0.04 | 1.39  | 0.238 |
| Distance to the ILake         | C2 | -0.04 | 0.00 | 83.77 | 0.000 |
| Distance to the nearest river | C2 | 0.05  | 0.01 | 37.00 | 0.000 |
| Land surface temperature Feb  | C2 | 0.12  | 0.78 | 0.02  | 0.880 |

Table S2-2. Variable significance test

|                                | Degree of Freedom | Log-Likelihood | Chi-Square | p      |
|--------------------------------|-------------------|----------------|------------|--------|
| Intercept                      | 2                 | -2119.27       |            |        |
| Net Number per household       | 2                 | -2112.53       | 13.48      | 0.0012 |
| N water pond                   | 2                 | -2102.99       | 19.07      | 0.0001 |
| Weighted N pond                | 2                 | -2089.12       | 27.75      | 0.0000 |
| Weighted N habitats wet season | 2                 | -2075.02       | 28.19      | 0.0000 |
| Weighted N habitats dry season | 2                 | -1972.61       | 204.83     | 0.0000 |
| NDVI Oct                       | 2                 | -1831.78       | 281.66     | 0.0000 |
| NDVI Sep                       | 2                 | -1827.68       | 8.19       | 0.0166 |
| NDVI May                       | 2                 | -1815.69       | 23.99      | 0.0000 |
| NDVI Apr                       | 2                 | -1775.16       | 81.05      | 0.0000 |
| EVI Dec                        | 2                 | -1752.48       | 45.37      | 0.0000 |
| EVI May                        | 2                 | -1745.73       | 13.48      | 0.0012 |
| EVI Feb                        | 2                 | -1741.09       | 9.29       | 0.0096 |
| Land surface roughness         | 2                 | -1720.40       | 41.37      | 0.0000 |
| Valley bottom flatness         | 2                 | -1714.02       | 12.76      | 0.0017 |
| Soil water capacity            | 2                 | -1688.71       | 50.63      | 0.0000 |
| Curvature volume               | 2                 | -1684.07       | 9.26       | 0.0097 |
| Distance to the ILake          | 2                 | -1634.99       | 98.17      | 0.0000 |
| Distance to the nearest river  | 2                 | -1614.90       | 40.17      | 0.0000 |
| Land surface temperature Feb   | 2                 | -1605.99       | 17.82      | 0.0001 |
