# Supplementary material
Source: PubMed Central journal article supplement (PMC8045647)

Supplementary Figure S1. Distribution of clusters/villages after adjusted for altitude. Numbers represented village labels used in Figure 5. This is a simplified version of Figure 6 without showing locations of habitats.

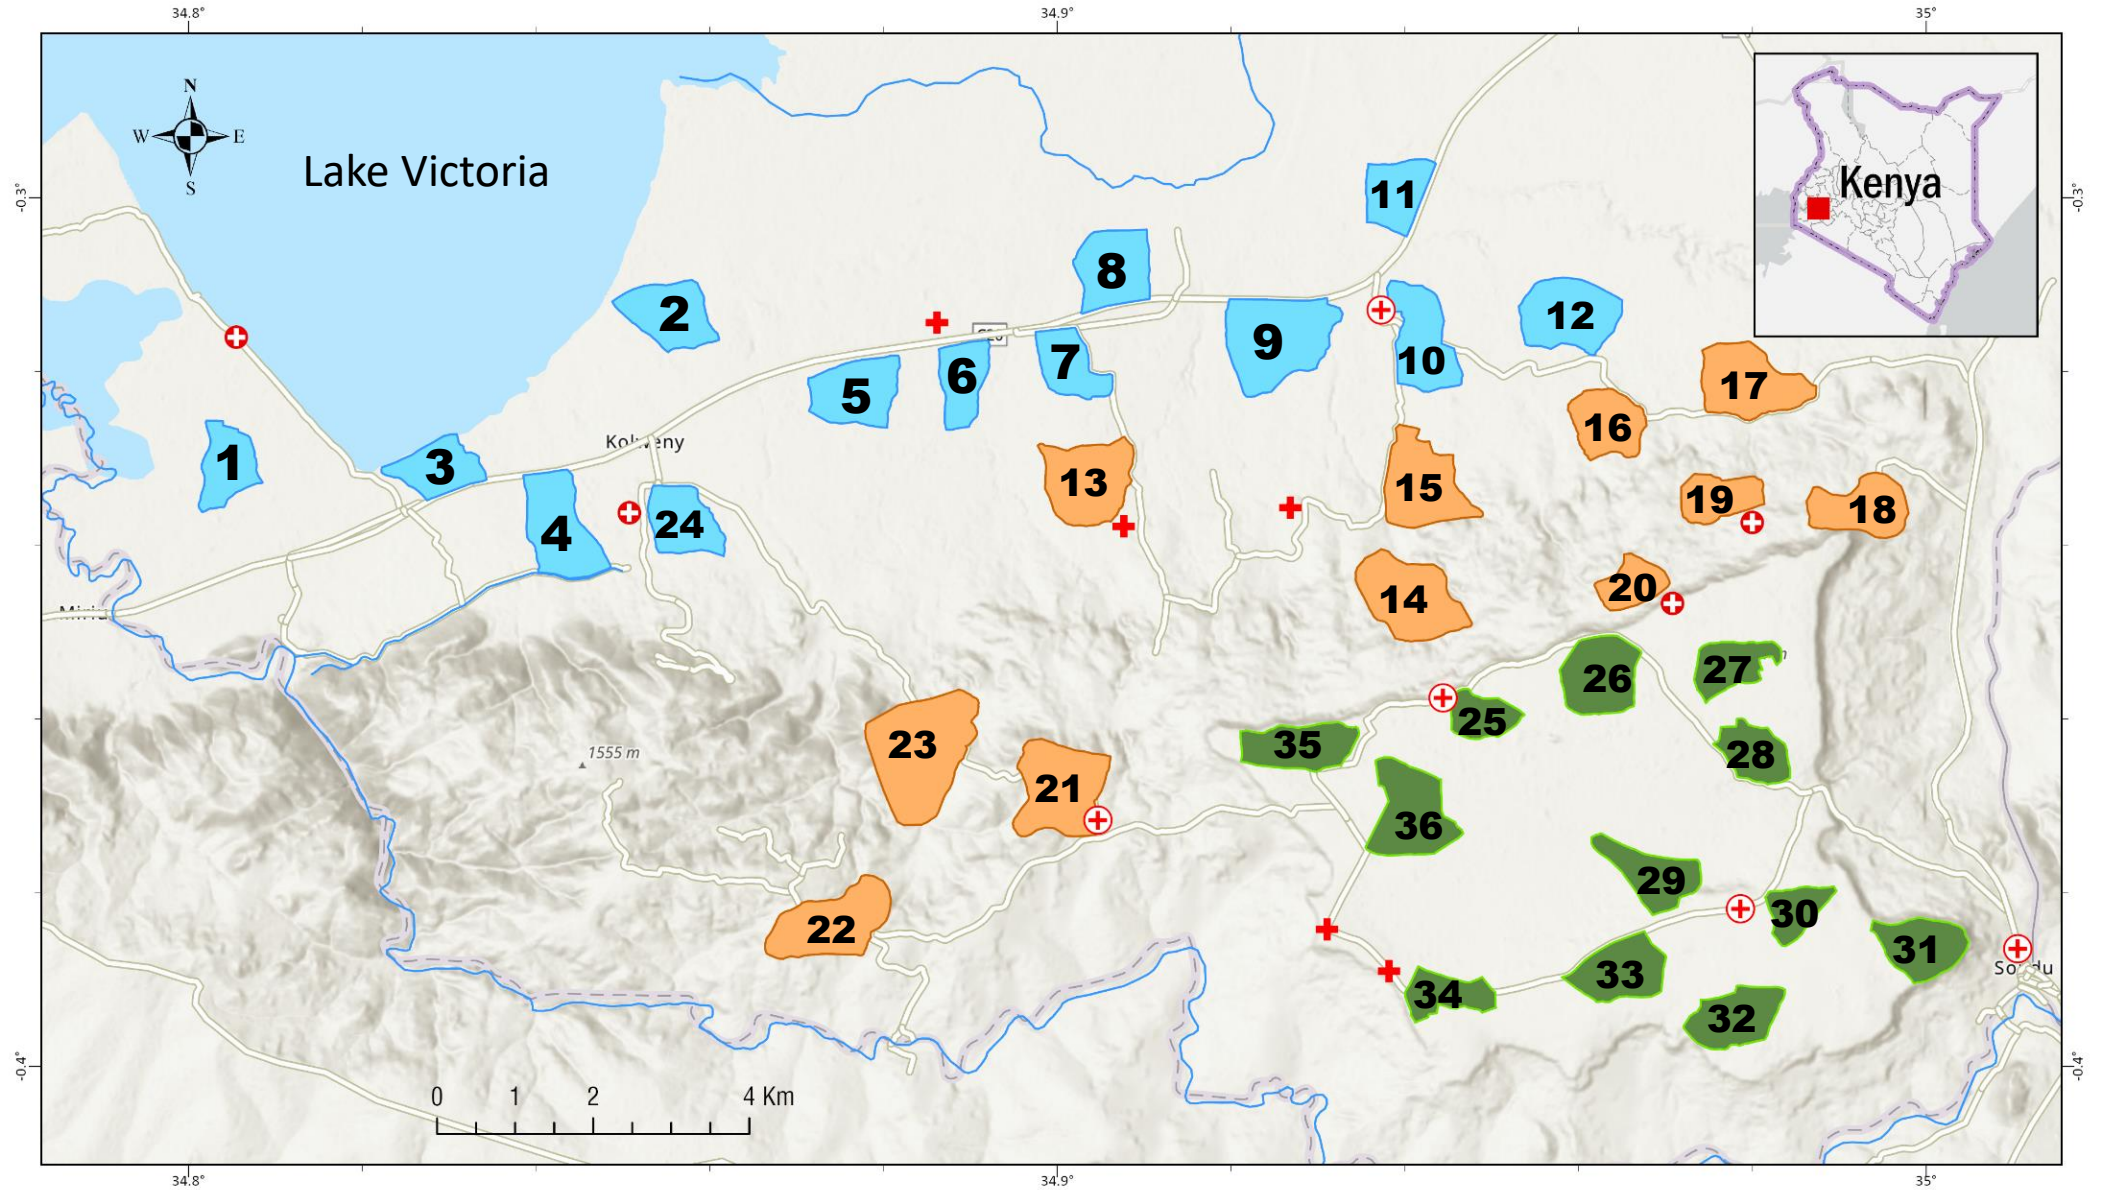

Supplement: tpmd201211.SD5.pdf [file tpmd201211.SD5.pdf]
